# Supplementary material for: How to Learn and How to Teach the Five Content Areas: Programming Languages, Game Design, Computer Thinking, Algorithmic Thinking and Robotics Programming - A Systematic Review of Journal Publications From 2015 to 2020”
Source: Preprints.org preprint supplement (doi:10.20944/preprints202301.0505.v1), 2023-01-27
Supplement: Supplementary file 52 [file Editorijal -dobar za pisanje.pdf › Suplement materijals/Radovi 2015-2019 Computer and Education iz oblasti programiranja/Review article/2017/Editorijal -dobar za pisanje.pdf]

# Accepted Manuscript

Research on ICT in K-12 schools - a review of experimental and survey-based studies in Computers & Education 2011 to 2015

M. Pérez-Sanagustín, M. Nussbaum, I. Hilliger, C. Alario-Hoyos, R.S. Heller, P. Twining, C.-C. Tsai

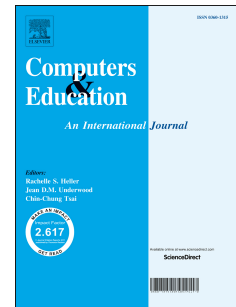

PII: S0360-1315(16)30164-6

DOI: [10.1016/j.compedu.2016.09.006](https://doi.org/10.1016/j.compedu.2016.09.006)

Reference: CAE 3066

To appear in: *Computers & Education*

Please cite this article as: Pérez-Sanagustín M, Nussbaum M., Hilliger I., Alario-Hoyos C., Heller R.S., Twining P. & Tsai C.-C., Research on ICT in K-12 schools - a review of experimental and survey-based studies in Computers & Education 2011 to 2015, *Computers & Education* (2016), doi: 10.1016/j.compedu.2016.09.006.

This is a PDF file of an unedited manuscript that has been accepted for publication. As a service to our customers we are providing this early version of the manuscript. The manuscript will undergo copyediting, typesetting, and review of the resulting proof before it is published in its final form. Please note that during the production process errors may be discovered which could affect the content, and all legal disclaimers that apply to the journal pertain.

**Editorial:****Research on ICT in K-12 schools - a review of experimental and survey-based studies in Computers & Education 2011 to 2015**

**Pérez-Sanagustín, M.**<sup>1</sup>, **Nussbaum, M.**<sup>1</sup>, **Hilliger**<sup>1</sup>, **I.**, **Alario-Hoyos, C.**<sup>2</sup>, **Heller, R. S.**<sup>3</sup>, **Twining, P.**<sup>4</sup>, **Tsai, C-C.**<sup>5</sup>

1. Pontificia Universidad Católica de Chile
2. Universidad Carlos III de Madrid
3. George Washington University
4. The Open University, UK
5. National Taiwan University of Science and Technology

## **Editorial: Research on ICT in K-12 schools - a review of experimental and survey-based studies in Computers & Education 2011 to 2015**

### **1. Introduction**

What is the role of a journal? Is it to follow the research or lead it? For the former, it is to serve as an archival record of the scholarship in a field. It can serve to permit the research community to engage with each other via the written record. But, for the latter, it can serve the research community by pointing out gaps in the research based on the archival record. This review is intended to do just that.

In recent years there has been an increasing interest in how Information and Communication Technology (ICT) has been used to enhance learning in schools. There are several reasons for this growing interest. Firstly, ICT has the potential to change the nature of disciplines – it changes the sorts of questions you can answer, the ways in which you go about answering them, and the ways in which you represent your understandings. Secondly, ICT provides new ways of supporting learners - it changes pedagogy. Thirdly, ICT opens up access to information, and some claim that it provides opportunities to widen access to education (OECD 2015a, OECD 2015b). Finally, ICT already forms part of the daily lives of children. There is therefore a need to develop learners who can work critically and function in an ICT-rich, connected society.

Many papers have been published by the educational technology research community regarding the needs and effects of using ICT in the classroom (Condie & Munro, 2007; Fu, 2013). Among the reported effects are an improvement in learning and the development of basic, transversal skills or competences. Some of these studies are more teacher-centered, focused on identifying the needs and barriers for ICT adoption at school; others are more student-centered, analyzing the effects that the use of technology has on learner performance. There is consensus among teacher-centered studies that successful implementation of ICT requires the involvement of students, teachers, senior leaders in schools and policy makers as part of the process (Mumtaz, 2000; Ringstaff & Kelley, 2002; Fu, 2013). In terms of educational policies, a recent review, developed by national and local governments of Norway, Flanders and England, analyzed the content features of educational curricula for primary education (Aesaert, Vanderlinde, Tondeur, & van Braak, 2013). The results of the aforementioned review suggest that curricula emphasize the need for developing a critical, safe and responsible use of educational technology. With regards to student-centered studies, the technical report by Condie & Munro (2007) analyzes the results from a literature review of over 350 published articles that reveal the positive impact of ICT use on student performance at school. This study highlights the fact that ICT has the

greatest impact on student performance when it is included as a regular part of the classroom experience. Research has also shown that the use of ICT also improves motivation and engagement, resulting in greater persistence and a more profound understanding among students (Underwood, 2009). A positive impact on student performance has also been obtained with particular technologies. This is the case, for instance, of mobile technologies, according to the review by Wu, Jim, Chen, Kao, & Lin (2012).

However, and despite these positive findings regarding the use of ICT in schools reported in the literature, a major review of the impact of ICT in education across phases of education (Luckin, Bligh, Manches, Ainsworth, Crook, & Noss, 2012) found that “evidence of digital technologies producing real transformation in learning and teaching remains elusive” (p.8) and “much existing teaching practice may well not benefit greatly from new technologies” (p.64). This view was supported by a recent analytical report by the OECD (OECD, 2015a) that suggests that the embedding, and thus impact, of technology in education remains sub-optimal. The report by OECD presents a comparative analysis of the digital skills acquired by students in 64 countries (34 OCED countries and 30 partner countries). The main findings are that as currently used in these countries: (1) the use of computers in the classroom is still very low (only 72% of students reported that they use the computer in the classroom); (2) students who report a moderate use of computers at school achieve better learning outcomes than those who use them rarely, but worse than those who use them very often; (3) the use of computers at school does not lead to appreciable improvements in students’ reading, mathematics or science skills; and (4) technology does not help bridge the skills gap between advantaged and disadvantaged students. That is, this report points out that the ways in which ICT has been used so far are not having the expected beneficial impacts. Therefore, there is a need of exploring new approaches in which technology is embedded more effectively in education.

Computers & Education is considered one of the most influential journals in the field of educational technology (Zurita, Merigó, & Lobos-Ossandón, 2015) and is positioned in the top 5% in its category by Thomson Reuters through the Journal Citation Report in both Social Sciences Citation Index (SSCI) and Science Citation Index (SCI). Given the findings reported by the OECD, we contend that the educational technology community has the responsibility to open a debate and a critical discussion about **how we address the study of the impact and adoption of ICT in schools, and how ICT has contributed to improving student learning, competences and skills development**. To this end, this editorial presents a **systematic, quantitative review** (Green, Johnson, & Adams, 2006; Pan, 2008, pp. 1-5) of the studies published in **Computers & Education** over the last five years (**from 2011 to 2015**). Our aim is to learn from the most cited publications and shed light on how future research within the educational technology community should be conducted.

This systematic review of the impact and adoption of ICT in K-12 schools looks to provide an overview of current research in Computers & Education and address the problems reported by the OECD (OECD, 2015a). Specifically, seven research questions (RQ) that arise from the main research objective are addressed in this review:

- RQ1. Which papers have been the most cited over the past five years?
- RQ2. Where was the research carried out?
- RQ3. Which disciplines were addressed?
- RQ4. Which levels of education were addressed?
- RQ5. Who are the study participants and what are the competences aimed to be improved of these participants?
- RQ6. Which methods were used to analyze the impact/adoption of technology in school settings?
- RQ7. How was this research funded?

## 2. Methodology

The methodological approach adopted for this paper consists of a systematic review (Green et al. 2006; Pan, 2008, pp. 1-5). Systematic literature reviews are a form of research that help bring a new perspective to the topic that is reviewed and generate new knowledge (Kitchenham, 2004; Torraco, 2005). Other studies on educational technology have previously used this methodological approach as a framework for organizing a literature review, especially in the field of science education (Gikandi, Morrow, & Davis, 2011; Manathunga & Hernández-Leo, 2015).

The major advantage of the systematic review approach is that “it provides information about the effects of some phenomenon across a wide range of settings and empirical methods” (Kitchenham, 2004 p. 2). In this case, we include publications addressing the problem from the perspectives of the different school stakeholders of how technology has contributed to improving learning. A second advantage is that systematic review has proven to be effective for reviewing, analyzing, critiquing and re-conceptualizing knowledge in mature areas in order to identify gaps in current research and formulate a research agenda that poses new ideas and directions for future investigation in the field.

The systematic review process was articulated following the three steps proposed by Kitchenham (2004): *planning the review*, *conducting the review* and *reporting the review*. The following subsections describe the first two phases of the review, highlighting the importance of this work as well as detailing how the literature review was organized, how the corpus of papers was selected, and the process that was followed by the reviewers. The reporting of the results can be found in section 3.

## 2.1 Importance of the review

Before carrying out this study, we conducted preliminary research to identify whether a similar literature review on the topics addressed in this paper was already available. For this research, we formulated a search clause in the Scopus database. This database is commonly used in the field of educational technology because it includes the most relevant publications of peer-reviewed scientific journals in this area (considering impact factor), as well as in other related fields such as Social Sciences, Engineering and Computer Science (Falagas, Pitsouni, Malietzis, & Pappas, 2008). The aim of the search clause in Scopus was to detect the main terms related with the research focus, i.e. “review”, “school”, “K-12”, “technology”, and “ICT”<sup>1</sup>, in the title, abstract and keywords of any paper published since the beginning of 2010. This query did not return any results. The same outcome was obtained when deleting the word “technology” or the word “school” from the search clause. One paper was obtained when deleting the word “ICT”, but this paper did not turn out to be representative. Finally, when deleting the word “K-12” from the search clause, the query returned 62 papers. However, of these, the only papers that actually consisted of a review were either focused on a particular region (e.g., Hong Kong (Lam & Woodhead, 2012), China, USA (Alamin, Shaoqing, & Le, 2015), South Africa (Goosen & Van Der Merwe, 2015), etc.), or on a particular area of knowledge (language learning (Yang, H., 2012), music education (Southcott, & Crawford, 2011), etc.). These papers therefore do not offer a broad perspective of how ICT is employed in K-12 schools, thus justifying the need for this review.

## 2.2 Planning the review: organization of the systematic review

### 2.2.1. Paper Selection

The initial step before conducting the review consisted of selecting the corpus of papers for subsequent analysis. Since the aim of the paper is to point out gaps in the research on the impact of ICT in K-12 schools to capture somehow what is currently happening in the educational technology community, we considered papers published in *Computers & Education* over the last five years, from the beginning of 2011 to the end of 2015. Scopus was selected as the database for conducting the filtering process. Although we could have used the Science Direct database, which is directly linked from *Computers & Education*, we preferred using Scopus for two reasons. Firstly, Scopus includes features for generating advanced queries and saving them. This facilitated the process of filtering the corpus of papers related with the impact and adoption of ICT in K-12 schools from among all of the papers published in *Computers & Education* between 2011 and 2015. Secondly, this database also offers features for exporting the results from searches as spreadsheets, thus facilitating any subsequent analysis.

---

<sup>1</sup>Query: TITLE-ABS-KEY ( school, K-12, technology, review, ICT ) AND PUBYEAR > 2010

The specific key words used for the filtering process were “school” OR “K-12” OR “classroom”, and the search included titles, abstracts and keywords<sup>2</sup>. The aim of choosing “school” as a key word was to include any papers where research was conducted in secondary school, primary school and/or pre-school. The term “K-12” was used so as to include any studies using the American nomenclature. Finally, “classroom” was chosen in order to include any papers that do not specify the learning setting, but where technology is used in school.

Computers & Education published 1,216 papers between January 2011 (volume 65) and December 2015 (volume 90)<sup>3</sup>. These 1,216 papers were filtered using the Scopus database and the keywords mentioned above. The result was a pool of 511 papers, which were defined as the corpus of analysis. From this pool, 352 papers were selected<sup>4</sup> and 159 papers were excluded because of a lack of experimental validation in their methods, or because the sample of the study was not in K-12 education (Table 1). Exceptions to the latter were studies reporting results on pre-service teacher education. As pre-service teachers are the future of ICT use in K-12 schools, these studies were therefore included in the analysis, considering the teachers as study participants. It is important to note that this study is focused on experimental and survey-based studies and does not consider research that is exploratory (finding out what is happening and why – with no intervention, other than the researcher’s presence/data collection).

**Table 1** Results from the selection process

| <b>Selection results</b>                  | <b>No of papers</b> |
|-------------------------------------------|---------------------|
| Included                                  | 352                 |
| Excluded (No experimental validation)     | 17                  |
| Excluded (Participants over 18 years old) | 142                 |
| Papers on the corpus of analysis          | 511                 |

### 2.2.2 Mapping the research questions onto the data

Each of the research questions was matched to one or more categories for conducting the systematic review. Table 2 shows the complete list of research questions that were addressed and a description of the analytical categories that were defined.

2 Query: "(SRCTITLE(computers and education) AND TITLE-ABS-KEY(school) OR TITLE-ABS-KEY(K-12) OR TITLE-ABS-KEY(classroom)) AND DOCTYPE(ar) AND PUBYEAR > 2010 AND PUBYEAR < 2016 AND ( LIMIT-TO(EXACTSRCTITLE,"Computers and Education" ) )"

3 Query: (SRCTITLE(computers and education) AND PUBYEAR > 2010 AND PUBYEAR < 2016 AND ( LIMIT-TO(EXACTSRCTITLE,"Computers and Education" ) )"

4 Pool of papers (N=352) considered in this study:

[https://docs.google.com/spreadsheets/d/1OZ3uCOt9li08\\_zeE\\_aekqj3su\\_8wWbaV\\_049h6Wod1l/edit?usp=sharing](https://docs.google.com/spreadsheets/d/1OZ3uCOt9li08_zeE_aekqj3su_8wWbaV_049h6Wod1l/edit?usp=sharing)



**Table 2** List of research questions and associated categories for the analysis.

| Research question (RQ)                                                                                       | Categories (C)                                                                                                                                                                                                                                                                                                                                                                                                                                                                                                                    |
|--------------------------------------------------------------------------------------------------------------|-----------------------------------------------------------------------------------------------------------------------------------------------------------------------------------------------------------------------------------------------------------------------------------------------------------------------------------------------------------------------------------------------------------------------------------------------------------------------------------------------------------------------------------|
| RQ1. Which papers have been the most cited over the past five years?                                         | (C1a) Number of Citations in Scopus; (C1b) Number of Citations in Google Scholar.                                                                                                                                                                                                                                                                                                                                                                                                                                                 |
| RQ2. Where was the research carried out?                                                                     | (C2) Corresponding author affiliation: <i>Africa, Asia, Eastern Europe, Latin America &amp; Caribbean, Middle East, North America, Oceania and Western Europe.</i>                                                                                                                                                                                                                                                                                                                                                                |
| RQ3. Which disciplines were addressed?*                                                                      | (C3) Disciplines based on a modified version of the taxonomy of knowledge domains adopted in Wu et al. (2012): <i>Humanities; Social Sciences; Natural Sciences; Formal Sciences</i> , which includes <i>Mathematics, Teaching Computer Science, and Robotics; Professions and Applied Sciences</i> , which include Education, Engineering, Health Sciences and Law, and <i>Transversal</i> (cross-disciplinary studies or studies addressing 21 <sup>st</sup> century competencies, such as collaboration, communication, etc.). |
| RQ4. Which levels of education were addressed?                                                               | (C4) Education level defined according to the 2 <sup>nd</sup> stage organization mechanism: <i>Pre-school</i> (4 years or under), <i>Primary</i> (5-11 years old), <i>Secondary</i> (12-18 years old) and <i>School in General</i> (when the age of the children is not specified).                                                                                                                                                                                                                                               |
| RQ5. Who are the study participants and what are the competences aimed to be improved of these participants? | (C5a) Main study participants, which can be teachers, students, parents or administrators/head teachers; (C5b) Main focus of the research, an open space in which to write the paper's topic of study. This last category is proposed to identify the competences aimed to be improved/analyzed on the participants in the study.                                                                                                                                                                                                 |
| RQ6. Which methods were used to analyze the impact/adoption of technology in school settings?*               | (C6a) The data gathering techniques ( <i>quantitative, qualitative, mixed</i> ); (C6b) Participants, distinguishing between studies that involve study participants in the design of the solution from those that do not; (C6c) Period during which the intervention is applied; i.e. period in which the experiment takes place; and (C6d) Number of participants in the experiment.                                                                                                                                             |
| RQ7. How was this research funded?                                                                           | (C7) Funding source according to the acknowledgments included in the paper, distinguishing between <i>private, public</i> or <i>local funding</i> (i.e. when the funds come from the institution carrying out the research).                                                                                                                                                                                                                                                                                                      |

\*More information on these categories is included in the results section (Section 3).

### 2.3. Conducting the review: a three-phase approach

In **Phase 1** three researchers, experts in the area of Technology Enhanced Learning participated in an **initial review process**. The reviewers classified and coded the papers according to the categories defined in Table 2, analyzing only the title, keywords and abstract of the papers. This process was carried out using a shared Google Spreadsheet<sup>5</sup>. This Google Spreadsheet was configured as a concept matrix including the different categories (the main units of analysis) in order to synthesize the analysis (Webster &



Watson, 2002). For some units, this matrix also included a list of proposed attributes in order to ensure the consistency of the analysis. For example, for the category (C2) *Corresponding affiliation of the main author* there was a drop-down menu to indicate the region of the main author (Africa, Asia, Eastern Europe, Latin America & Caribbean, Middle East, North America, Oceania and Western Europe). The 352 papers were distributed among the three researchers. In a second round, the researchers reviewed the papers analyzed by others so as to guarantee consistency and agree on their categorization, especially for papers tagged as “not clear” by the first reviewer.

After this first phase, we detected that some relevant information was not contained in the title, keywords or abstract of the papers. For example, some papers did not include information about the number of participants involved in the experimental design. Others did not specify the research design, while none of them referred to the funding sources in the abstract.

In **Phase 2**, the attributes missing from the first round were completed. A fourth researcher was invited to participate in this phase. This researcher reviewed all the papers, analyzing both the methodology and acknowledgement sections in order to complete the attributes related to categories C6a, C6b, C6c, C6d, and C7 (Table 2). Subsequently, two of the researchers that participated in the first phase reviewed any papers in which this information was not clearly stated so as to contrast the analysis and discuss their final decision, thus guaranteeing consistency.

In **Phase 3**, the resulting spreadsheet was analyzed using the statistical software tool StataIC 14 to evaluate the integrity of the data that was extracted. The results from the paper categorization were tabulated in order to detect any repetitions and ensure that the information was complete. In this phase, incomplete attributes were detected, as well as inconsistencies between words with the same meaning but written differently (e.g. “behavior” or “behaviour”).

Following this three-phase process ensures both the reliability and the validity of the review (Read, 2013). The analysis of a large number of published papers ensures the reliability of the process, as well as the consistency of the conclusions. The corpus of analysis (352 papers) represents a significant population of published studies. Additionally, papers were also selected from one of the most cited journals in the field of educational technology, which ensures that certain quality standards are met. Furthermore, two mechanisms were used to ensure the internal and external validity of the analysis. Firstly, four researchers cross-analyzed the papers that were selected by reviewing and discussing the categories assigned to each paper from different perspectives. Secondly, a systematic procedure was used for selecting papers, thus ensuring the validity of this study.

### 3. Reporting the review: descriptive results and discussion

#### *RQ1: Which papers have been the most cited over the past five years? Scopus & Google Scholar Citations*

**Error! Reference source not found.** shows the number of publications selected for each year, and the range of citations according to Scopus and Google Scholar. Since Google Scholar not only includes citations in scientific publications but also in dissertations, books, pre-prints, and technical reports, among others, the number of citations per paper is greater than or equal to those in Scopus. In order to determine the most cited papers, we identified the papers that were responsible for 50% of the citations in both the Google Scholar and Scopus, from among the selected pool of papers. In this sense, 50% of citations were concentrated among 15.45% of the papers, i.e. 54 of 352 papers. These 54 papers are taken as the list of the most cited papers. Moreover, and as shown in Figure 1, most publications are distributed in the lowest number of citations according to both Scopus and Google Scholar. The most cited papers considered in this study are listed according to their number of citations in Annex I. **Error! Reference source not found.** describes the results obtained from the analysis of all the selected papers (N=352), and compares them with the results of running the same analysis with the most cited papers (N=54).

We select the most cited papers as a measure to understand the impact of the research analyzed, however this method has some limitations. Firstly, there is a long time lag between a paper being published and citations appearing, so more recent papers will inevitable have fewer citations. Secondly, citations indicate that the paper has been referenced elsewhere but tells you nothing about the nature of the reference – so, for example, the referring paper may be critiquing the referenced paper (which would suggest that that citation was not an indicator of influence).

**Table 3** Description of the papers included in this review

|                                                       | 2011  | 2012  | 2013  | 2014 | 2015 |
|-------------------------------------------------------|-------|-------|-------|------|------|
| <b>All papers included in the review (N=352)</b>      |       |       |       |      |      |
| Number of papers                                      | 76    | 61    | 73    | 71   | 72   |
| Range of Google Scholar citations per paper (max-min) | 139-2 | 86-1  | 96-0  | 29-0 | 7-0  |
| Range of Scopus citations per paper (max-min)         | 63-0  | 44-0  | 46-0  | 17-0 | 4-0  |
| <b>Average citations per year in Google Scholar</b>   | 40.69 | 29.59 | 20.00 | 8.5  | 1.55 |
| <b>Average citations per year in Scopus</b>           | 18.76 | 12.06 | 8.50  | 3.49 | 0.46 |
| <b>Most cited papers (N=54)</b>                       |       |       |       |      |      |
| Number of papers                                      | 29    | 17    | 8     | 0    | 0    |

|                                                       |        |       |       |   |   |
|-------------------------------------------------------|--------|-------|-------|---|---|
| Range of Google Scholar citations per paper (max-min) | 139-31 | 86-38 | 96-42 | - | - |
| Range of Scopus citations per paper (max-min)         | 63-14  | 44-10 | 46-14 | - | - |
| <b>Average citations per year in Google Scholar</b>   | 73.45  | 59.90 | 61.10 | - | - |
| <b>Average citations per year in Scopus</b>           | 33.66  | 25.70 | 25.60 | - | - |

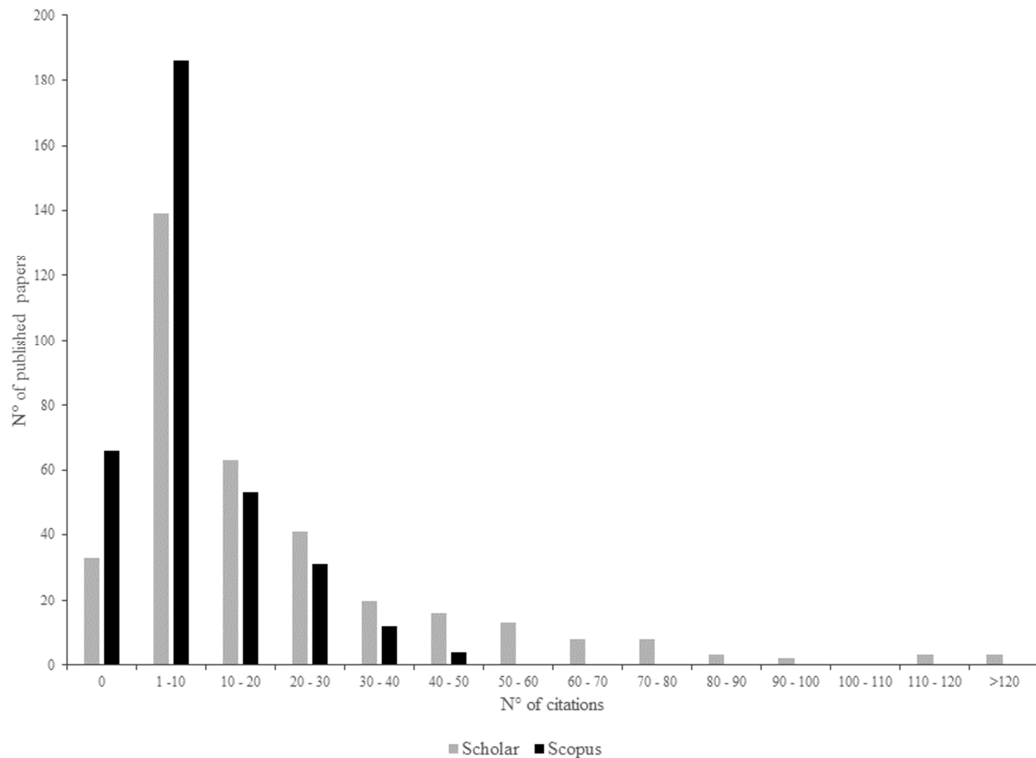

**Figure 1** Histogram of the papers according to the number of citations in both Scopus and Google Scholar. The figure shows that most publications are distributed in the lowest number of citations and that only a few papers accumulate most of the citations.

### ***RQ2: Where was the research carried out? Corresponding author affiliation***

The region of the corresponding author affiliation was analyzed to identify where the selected studies were conducted. Although the author affiliation does not necessarily indicate the country where the study was conducted, it is an indicator of the investment that different countries make on this type of research. Table shows the eight different regions that were considered in the study. The most productive region in terms of numbers of papers published is Asia, with 33% (N=117) of all the selected papers, followed by Western Europe (23%; N=82) and North America (21%; N=72). Thus, three regions of the world produced more than 75% of the published research regarding the use of ICT in K-12 schools. When analyzing the most cited papers, we observe that this percentage increases to 83%. It is worth noting that most of the research in the field cannot be generalized for underrepresented regions, such as Africa, Eastern Europe, Latin America, Middle East or Oceania. In the breakdown by regions, it is worth noting that 73 of 117 (62%) of Asian papers are from Taiwan. In Western Europe, from the 82 papers, the leading countries are

United Kingdom (N=15), Belgium (N=14), and the Netherlands (N=14). Finally in North America, United States is the leader of the research with 92% of the papers published in the region (N=66).

**Table 4** Number of published papers per region according to corresponding author affiliation

| Region                    | All papers included in the review |             | Most cited papers |             |
|---------------------------|-----------------------------------|-------------|-------------------|-------------|
|                           | No. of papers                     | %           | No. of papers     | %           |
| Africa                    | 2                                 | 1%          | 1                 | 2%          |
| Asia                      | 117                               | 33%         | 21                | 39%         |
| Eastern Europe            | 18                                | 5%          | 2                 | 4%          |
| Western Europe            | 82                                | 23%         | 12                | 22%         |
| Latin America & Caribbean | 18                                | 5%          | 3                 | 5%          |
| Middle East               | 30                                | 8%          | 1                 | 2%          |
| North America             | 72                                | 21%         | 12                | 22%         |
| Oceania                   | 13                                | 4%          | 2                 | 4%          |
| <b>Total</b>              | <b>352</b>                        | <b>100%</b> | <b>54</b>         | <b>100%</b> |

### ***RQ3: Which disciplines were addressed?***

Table 5 shows the disciplines in which the studies were conducted; that is, the knowledge area of the course or educational event in which the study takes place. In some cases, what the authors of the study want to achieve or improve is related with the discipline, but in some cases it is not (i.e. the study takes place in a course on Calculus – the discipline would be Mathematics –, but the authors aim is to improve students' collaboration skills – which in this study would correspond to the 'Transversal' category (see below)). Table 5 also indicates the number of papers in each discipline. Six disciplines were considered in the analysis based on a modified version of the taxonomy adopted in Wu et al. (2012):

- (1) Humanities, which include history, language and linguistics, literature, arts, etc.;
- (2) Social Sciences, which include economics, sociology, gender studies, etc.;
- (3) Natural Sciences, which include chemistry, physics, life sciences, etc.;
- (4) Formal Sciences, which include (4a) Mathematics, (4b) Computer Sciences, and (4c) Robotics. Although Wu et al (2012) included Mathematics, Computer Sciences and Robotics within a common category; we treated them as three discrete categories because these were categories employed in several of the papers analyzed.
- (5) Professions and Applied Sciences, which include education, engineering, health sciences, law, etc.
- (6) A new category which we labeled as "Transversal" to refer to: (1) cross-disciplinary studies, intervening or taking place in more than one discipline; and (2) studies focusing mainly on the development of transversal skills or competences such as collaboration, critical thinking, etc. It also includes those papers that analyze how ICT is used in an educational context for professional or administrative purposes.

**Table 5** Number of published papers per discipline

| <b>Discipline</b>                | <b>All papers included in the review</b> |             | <b>Most cited papers</b> |             |
|----------------------------------|------------------------------------------|-------------|--------------------------|-------------|
|                                  | <b>No. of papers</b>                     | <b>%</b>    | <b>No. of papers</b>     | <b>%</b>    |
| Humanities                       | 55                                       | 15%         | 11                       | 20%         |
| Social Sciences                  | 6                                        | 2%          | 1                        | 2%          |
| Natural Sciences                 | 58                                       | 16%         | 19                       | 35%         |
| Formal Sciences (Total)          | 53                                       | 16%         | 4                        | 8%          |
| Mathematics                      | 30                                       | 9%          | 2                        | 4%          |
| Computer Sciences                | 21                                       | 6%          | 2                        | 4%          |
| Robotics                         | 2                                        | 1%          | 0                        | 0%          |
| Professions and Applied Sciences | 22                                       | 6%          | 3                        | 5%          |
| Transversal                      | 158                                      | 45%         | 16                       | 30%         |
| <b>Total</b>                     | <b>352</b>                               | <b>100%</b> | <b>54</b>                | <b>100%</b> |

The studies in most of the selected papers are not directly related to a particular discipline; rather they are cross-disciplinary studies, intervening or taking place in more than one discipline (45% classified as Transversal; N=158). This trend is followed by 16% (N=58) of selected papers addressing Natural Sciences, 15% (N=55) focusing on Humanities, and 9% (N=30) on Mathematics. Interestingly, Table 5 reveals that among the most cited papers, the most popular discipline was Natural sciences (35%; N=19), followed by Transversal skills (30%, N=16).

PISA assesses Humanities, Natural Sciences and Mathematics and, since 2015, transversal skills as well, such as collaboration (De Jong, 2012). Conversely, our review shows that most of the articles published in Computers & Education report mainly on transversal disciplines but not on the specific disciplines assessed by PISA. Another interesting finding is that Mathematics is represented in a smaller proportion of published papers compared to Humanities and Natural Sciences. This could be due to a limitation of our study, as we are only considering papers published in the Computers & Education journal, although there are other quality journal publications in mathematics teaching that we are not taking into consideration. Moreover, when analyzing the most cited papers, the proportion of papers focusing on Language and Natural Sciences increases significantly, while the proportion of papers focusing on Mathematics halves.

#### ***RQ4: Which levels of education were addressed? Levels of education***

The following levels of education were considered in this category: pre-school, for interventions with children aged 4 or under; primary, for interventions with children aged between 5 and 11; secondary, for interventions with children aged between 12 and 18; and school, for interventions with school children where the age is not explicitly indicated.

Additional categories were also included where there was a combination of levels that were addressed simultaneously in the papers that were analyzed: pre-school + primary, and primary + secondary.

Table shows that 165 of the selected articles focus on Secondary education (46%; N=165), of which 145 looked exclusively at Secondary education. 40% (N=141) of the papers focus on studies conducted at Primary level, of which 119 are focused solely on Primary education. In terms of the most cited papers,

Table shows that the most relevant papers are those that focus on one single level of education.

**Table 6** Number of published papers per Level of Education

| Level of Education   | All papers included in the review |             | Most cited papers |             |
|----------------------|-----------------------------------|-------------|-------------------|-------------|
|                      | No. of papers                     | %           | No. of papers     | %           |
| Pre-school           | 10                                | 3%          | 1                 | 2%          |
| Pre-school + Primary | 2                                 | 1%          | 0                 | 0%          |
| Primary              | 119                               | 34%         | 21                | 39%         |
| Primary + Secondary  | 20                                | 5%          | 0                 | 0%          |
| Secondary            | 145                               | 41%         | 22                | 41%         |
| School (unspecified) | 56                                | 16%         | 10                | 19%         |
| <b>Total</b>         | <b>352</b>                        | <b>100%</b> | <b>54</b>         | <b>100%</b> |

Finally, Table 7 shows the cross-analysis of the levels of education with disciplines (RQ3). We identified that most of the papers classified as Transversal intervene in Secondary education (74 papers, from which 57 are solely of Secondary Education), Primary education (67 papers, from which 50 are solely of Primary Education), or School in general (27 papers). Only 7 papers classified as Transversal are aimed at a pre-school level (Table ). In addition, we observe that most of the papers classified on the Computer Sciences section intervene mostly in Secondary education (11 papers, from which 10 papers are solely of Secondary Education), followed by Primary education (2 Pre-school + Primary and 6 Primary).

**Table 7** Number of papers per Level of Education and Disciplines

| Level of Education   | Human -ities | Social Sci. | Natural Sci. | Professions & Applied Sci. | Formal Sciences |               |          | Trans versal |
|----------------------|--------------|-------------|--------------|----------------------------|-----------------|---------------|----------|--------------|
|                      |              |             |              |                            | Math            | Computer Sci. | Robotics |              |
| Pre-school           | 2            | 0           | 0            | 0                          | 0               | 0             | 1        | 7            |
| Pre-school + Primary | 0            | 0           | 0            | 0                          | 0               | 2             | 0        | 0            |
| Primary              | 27           | 1           | 22           | 4                          | 9               | 6             | 0        | 50           |
| Primary+ Secondary   | 0            | 0           | 2            | 0                          | 0               | 1             | 0        | 17           |
| Secondary            | 22           | 4           | 28           | 7                          | 17              | 10            | 0        | 57           |
| School               | 4            | 1           | 6            | 11                         | 4               | 2             | 1        | 27           |

***RQ5: Who are the study participants and what are the competences aimed to be improved of these participants?***

Table 8 shows study participants in the research studies (C5a), categorized as: students, teachers, parents and head teachers/administrators. This category was proposed in order to identify the participants that are targeted in each study, that is, whether the focus of the research is to analyze/improve teachers, students, parents or administrators/head teachers' competences. In 77% (N=269) of the studies, the participants are the students, of which 240 studies are purely student-centered, without considering any other participants. Although published research stresses the importance of considering how teachers are using ICT in schools and for what purposes (Fu, 2013), only 30% (N=106) of the studies consider teachers as part of study participants or study sample (this includes Teachers Solely, and all possible combinations of teachers plus any other participant). Of this latter group, only 76 papers are purely teacher-centered. Figure 2 shows the evolution of the predominant study participants (teacher- and student-centered) over time.

**Table 8** Number of published papers per study participants

| Study participants                                           | All papers included in the review |             | Most cited papers |             |
|--------------------------------------------------------------|-----------------------------------|-------------|-------------------|-------------|
|                                                              | # of papers                       | %           | # of papers       | %           |
| Students                                                     | 240                               | 68%         | 35                | 65%         |
| Teachers                                                     | 76                                | 21%         | 15                | 28%         |
| Parents                                                      | 3                                 | 1%          | 1                 | 2%          |
| Head Teachers / Administrators                               | 3                                 | 1%          | 0                 | 0%          |
| Teachers + Students                                          | 21                                | 6%          | 3                 | 5%          |
| Teachers + Administrators                                    | 1                                 | 0%          | 0                 | 0%          |
| Teachers + Students + Parents                                | 2                                 | 1%          | 0                 | 0%          |
| Teachers + Students + Head Teachers/Administrators           | 4                                 | 1%          | 0                 | 0%          |
| Teachers + Students + Head Teachers/Administrators + Parents | 2                                 | 1%          | 0                 | 0%          |
| <b>Total</b>                                                 | <b>352</b>                        | <b>100%</b> | <b>54</b>         | <b>100%</b> |



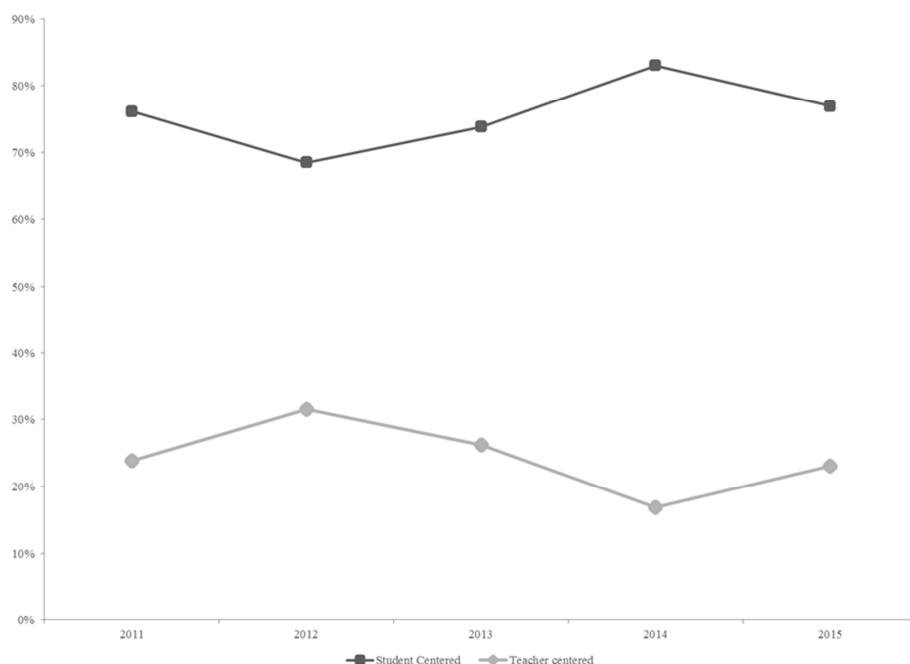

**Figure 2** Proportion of papers published per year according to predominant study participants within the corpus (teacher- and student-centered papers).

We also examined the main research focus (*C5b*) of the selected studies, which was classified according to the topics presented in Table 9. In contrast to the disciplines, the focus of these cases was on participants' specific competences that the research aimed to enhance rather than on particular disciplines. These categories were not defined from the beginning; instead they emerged throughout the review process and were added to the analysis when they were addressed by at least three papers. Any category covered by only one or two papers is included under "other". Table 9 shows that 39% ( $N=127$ ) of the papers focus on studying how to improve competences identified as 21<sup>st</sup> century skills (Finegold & Notabartolo, 2010), with 12% ( $N=43$ ) of the papers addressing ICT operations and concepts (aspects that have to do with the operation of ICT (using a program, for example) and concepts such as network, internet, etc.). When examining the most cited papers, the results show that 17% ( $N=9$ ) of the papers address the interaction of study participants (both, teachers and students) with technology; i.e., analyzing user interface interactions, logfiles with the systems, etc. The most cited papers are followed by those that explore how to improve learning in a particular topic or area (13%;  $N=7$ ), as well as those that address motivation (13%;  $N=7$ ).

Our review reveals that 17% of the papers focus on analyzing/improving participants' learning outcomes, 13% of the papers analyze the interaction of the participants with a particular technology/tool, and 12% focus on analyzing/improving competences related with ICT operations and concepts. In addition, we observe that most of the articles included

in this systematic review explore transversal knowledge and abilities, such as the so-called 21<sup>st</sup> century skills.

With regards to the development of 21<sup>st</sup> century skills, experts considered the possibility of reformulating the PISA instrument in order to include them (De Jong, 2012). The assessment of problem solving and financial skills was already included in 2012, and collaborative problem solving was incorporated in 2015. Research that is published on transversal skills should therefore inform these ongoing discussions about the PISA programme and further work on student assessment. These results suggest that there is a lot of research within the community that aims to improve transversal skills. This might have a positive effect on future PISA examinations that include assessment of such skills.

**Table 9** Research aim of papers included in the review

| <b>Research aim</b>                   | <b>All papers included in the review</b> |             | <b>Most cited papers of those included in the review</b> |             |
|---------------------------------------|------------------------------------------|-------------|----------------------------------------------------------|-------------|
|                                       | <b>No. of papers</b>                     | <b>%</b>    | <b>No. of papers</b>                                     | <b>%</b>    |
| <b>21<sup>st</sup> Century Skills</b> |                                          |             |                                                          |             |
| ICT Operations and concepts           | 43                                       | 12%         | 6                                                        | 11%         |
| Creativity/Innovation                 | 4                                        | 1%          | 0                                                        | 0%          |
| Critical Thinking                     | 22                                       | 6%          | 3                                                        | 5%          |
| Problem solving                       | 7                                        | 2%          | 3                                                        | 5%          |
| Collaboration                         | 24                                       | 7%          | 4                                                        | 7%          |
| Information Literacy                  | 13                                       | 4%          | 0                                                        | 0%          |
| Flexibility and adaptability          | 2                                        | 1%          | 0                                                        | 0%          |
| Initiative and self-direction         | 11                                       | 3%          | 1                                                        | 2%          |
| Productivity                          | 1                                        | 0%          | 0                                                        | 0%          |
| Leadership and responsibility         | 9                                        | 3%          | 0                                                        | 0%          |
| <b>Other</b>                          |                                          |             |                                                          |             |
| Assessment                            | 24                                       | 7%          | 3                                                        | 6%          |
| Beliefs                               | 21                                       | 6%          | 6                                                        | 11%         |
| Disabilities                          | 4                                        | 1%          | 1                                                        | 2%          |
| Inequalities                          | 4                                        | 1%          | 0                                                        | 0%          |
| Interaction                           | 47                                       | 13%         | 9                                                        | 17%         |
| Learning                              | 61                                       | 17%         | 7                                                        | 13%         |
| Motivation                            | 23                                       | 7%          | 7                                                        | 13%         |
| Orchestration                         | 4                                        | 1%          | 1                                                        | 2%          |
| TPACK/TPCK Instruments                | 7                                        | 2%          | 2                                                        | 4%          |
| Other                                 | 21                                       | 6%          | 1                                                        | 2%          |
| <b>Total</b>                          | <b>352</b>                               | <b>100%</b> | <b>54</b>                                                | <b>100%</b> |

By cross-analyzing the papers that address the most frequent Research Aims with Disciplines (RQ3) (Table 10), we identified that 31 of 40 papers that studied ICT

operations and interaction are focused on improving or analyzing Transversal Skills, while studies about learning are focused on a particular discipline (N=61) and papers about motivation (N=23) are mainly focused on Humanities or Transversal Skills.

**Table 10** Disciplines of papers focused on ICT Operations and Concepts, interaction, learning and motivation

| Most frequent research aim  | Humanities | Social Sci. | Natural Sci. | Professions & Applied Sci. | Formal Sciences |               |          |             |
|-----------------------------|------------|-------------|--------------|----------------------------|-----------------|---------------|----------|-------------|
|                             |            |             |              |                            | Math            | Computer Sci. | Robotics | Transversal |
| ICT Operations and Concepts | 2          | 1           | 2            | 1                          | 1               | 2             | 0        | 31          |
| Interaction                 | 8          | 1           | 7            | 1                          | 4               | 1             | 0        | 25          |
| Learning                    | 10         | 2           | 17           | 6                          | 10              | 5             | 1        | 10          |
| Motivation                  | 8          | 0           | 1            | 2                          | 2               | 1             | 1        | 8           |

#### ***RQ6: Methods used***

We analyzed four aspects related to the methods used in the studies (Tables 11-17). Firstly we looked at the nature of the data collected (C6a). Given that our criteria for selecting papers all of the studies that we analyzed were coming from an objectivist stance. Within this overarching objectivist framework, the studies did vary in the data gathering techniques. We have categorized these as Quantitative, Qualitative and Mixed. The results in Table 11 show that most of the papers collected quantitative data (50%; N=176), followed by a mixture of quantitative and qualitative data (34%; N=121).

**Table 11** Data collected within the papers included in the review

| Research method | All papers included in the review |             | Most cited papers of those included in the review |             |
|-----------------|-----------------------------------|-------------|---------------------------------------------------|-------------|
|                 | No. of papers                     | %           | No. of papers                                     | %           |
| Mixed           | 121                               | 34%         | 17                                                | 31%         |
| Qualitative     | 55                                | 16%         | 8                                                 | 15%         |
| Quantitative    | 176                               | 50%         | 29                                                | 54%         |
| <b>Total</b>    | <b>352</b>                        | <b>100%</b> | <b>54</b>                                         | <b>100%</b> |

The second aspect that was analyzed was the involvement of participants in the study (C6b). Since this study only focus on experimental and survey-based studies and does not considers exploratory research (research conducted to understand a problem that is not clearly defined), we categorize the papers between studies where the technological intervention or solution that is proposed is co-designed or considers the feedback or needs of study participants and those where it does not. We considered the former as any paper where the research method that is followed “pulls information from the user to build up the solution”. The Design-Based Research methodology (Wan & Hannafin, 2005) is one

example of such a method. When the research method does not take into consideration the study participants in the design of the solution, they are “*pushing*” the solution. When the focus of the analysis is an instrument for assessing a particular skill or competence, we classify this as “Not applicable” (Table 12). In terms of the involvement of participants, Table 12 shows that most of the research that is conducted does not consider the study participants in the solution that is proposed. Only 24% (N=85) of the studies considered the study participants in the solution proposed by the paper. For example, 4 papers in the latter group followed a Design-Based Research approach.

**Table 12** Research method adopted by all of the papers included in the review

| Research method                                          | All papers included in the review |             | Most cited papers of those included in the review |             |
|----------------------------------------------------------|-----------------------------------|-------------|---------------------------------------------------|-------------|
|                                                          | No. of papers                     | %           | No. of papers                                     | %           |
| Not applicable                                           | 38                                | 11%         | 8                                                 | 15%         |
| Does not consider the study participants in the solution | 229                               | 65%         | 34                                                | 63%         |
| Considers the study participants in the solution         | 85                                | 24%         | 12                                                | 22%         |
| <b>Total</b>                                             | <b>352</b>                        | <b>100%</b> | <b>54</b>                                         | <b>100%</b> |

The third aspect that was analyzed was the period across which the data were collected (C6c) (see Table 13). In this case, we distinguish between short-term interventions (less than five weeks or 5 sessions), middle-term interventions (between 5 and 12 weeks or sessions) and long-term interventions (more than 12 weeks or 12 sessions). The distinction between middle-term and long-term was defined by considering the number of weeks in a typical school term. Additionally, we classified any paper that analyzed data captured in a single intervention or existing data that did not require further data collection (e.g. validating a survey instrument) as “Not applicable”. If no information was given regarding the number of sessions or weeks for the study undertaken, the paper was classified as “No information”. Table 13 reveals that 21% (N=75) of the papers propose long-term interventions, followed by 14% (N=50) that propose middle-term interventions, and short-term with the 9% of the papers (N=31). In the case of the most cited papers, there is a significant increase in the percentage of short-term interventions, 15% (N=8).

**Table 13** Intervention period used for the studies included in the review.

| Intervention period           | All papers included in the review |     | Most cited papers of those included in the review |     |
|-------------------------------|-----------------------------------|-----|---------------------------------------------------|-----|
|                               | No. of papers                     | %   | No. of papers                                     | %   |
| Short-term                    | 31                                | 9%  | 8                                                 | 15% |
| Middle-term                   | 50                                | 14% | 6                                                 | 11% |
| Long-term                     | 75                                | 21% | 9                                                 | 17% |
| Not applicable/No Information | 196                               | 56% | 31                                                | 57% |

|              |            |             |           |             |
|--------------|------------|-------------|-----------|-------------|
| <b>Total</b> | <b>352</b> | <b>100%</b> | <b>54</b> | <b>100%</b> |
|--------------|------------|-------------|-----------|-------------|

The last aspect that was analyzed was the number of participants in the study (*C6d*) (See Table 14). Table 14 shows that 9% (N=31) of the papers proposed studies involving between 1 and 20 participants, followed by 36% (N=126) that involve between 20-100 participants, and 21% (N=76) of the studies that involve between 100 and 250 participants. Only 9% (N=30) of the studies involve between 500-1000 participants. Furthermore, we see that 48% (N=26) of the most cited studies involve between 1 and 100 participants, and 24% (N=13) between 100 and 250.

**Table 14** Range of participants in the papers included in the review.

| Range of participants | All papers included in the review |             | Most cited papers of those included in the review |             |
|-----------------------|-----------------------------------|-------------|---------------------------------------------------|-------------|
|                       | No. of papers                     | %           | No. of papers                                     | %           |
| 1-20                  | 31                                | 9%          | 5                                                 | 9%          |
| 20-100                | 126                               | 36%         | 21                                                | 39%         |
| 100-250               | 76                                | 21%         | 13                                                | 24%         |
| 250-500               | 42                                | 12%         | 3                                                 | 6%          |
| 500-1000              | 30                                | 9%          | 6                                                 | 11%         |
| >1000                 | 47                                | 13%         | 6                                                 | 11%         |
| <b>Total</b>          | <b>352</b>                        | <b>100%</b> | <b>54</b>                                         | <b>100%</b> |

Finally, we conducted a cross-analysis of some of the variables (Tables 15, 16 and 17). In Table 15 we can observe that the pattern for the number of participants involved differs for studies using quantitative data, where 54 out of 176 papers involve less than a hundred participants, and 62 involve between 100 and 500 participants.

**Table 15** Comparison of sample size against research method (excluding papers involving other combinations and those with no information regarding the level of education)

| Research Method | Sample size |        |         |         |          |       | Total |
|-----------------|-------------|--------|---------|---------|----------|-------|-------|
|                 | 0-20        | 20-100 | 100-250 | 250-500 | 500-1000 | >1000 |       |
| Mixed           | 4           | 55     | 33      | 14      | 6        | 9     | 121   |
| Qualitative     | 24          | 20     | 6       | 3       | 1        | 1     | 55    |
| Quantitative    | 3           | 51     | 37      | 25      | 23       | 37    | 176   |

When cross-analyzing the periods of intervention in relation to the Level of Education (Table 16), we observe that 31 of the 75 long-term studies take place specifically in Primary (N=32), and 26 are solely focused on Secondary education. This distribution between Primary and Secondary education changes for middle-term studies considering that the number of papers focused on Secondary is higher, and this difference between the two educational levels is not observed in short-term studies.

**Table 16** Comparison of intervention period with the Level of Education (excluding papers involving other combinations and those with no available information regarding the level of education)

| Intervention Period           | Level of Education |                    |         |                    |           |        | Total |
|-------------------------------|--------------------|--------------------|---------|--------------------|-----------|--------|-------|
|                               | Preschool          | Preschool +Primary | Primary | Primary +Secondary | Secondary | School |       |
| Long-term                     | 0                  | 1                  | 31      | 2                  | 26        | 15     | 75    |
| Middle-term                   | 3                  | 0                  | 17      | 2                  | 23        | 5      | 50    |
| Short-term                    | 1                  | 0                  | 12      |                    | 13        | 5      | 31    |
| Not applicable/No information | 6                  | 1                  | 59      | 16                 | 83        | 31     | 196   |

Finally, Table 17 shows that most long-term studies focus on Humanities (N=22), followed by Transversal disciplines (N=20) and Natural Sciences (N=12). Middle-term studies focus on the same disciplines but in a different order, prioritizing Transversal knowledge (N=15), then Humanities (N=6), Natural Sciences (N=6) and Math (N=6). Finally, short-term studies focus mostly on Humanities (N=9), Transversal knowledge (N=8), and Natural Sciences (N=8).

**Table 17** Comparison of Intervention period with disciplines

| Intervention period           | Hum. | Social Sci. | Natural Sci. | Prof. and Applied Sciences | Math | C. Sci. | Rob. | Transv. | Total |
|-------------------------------|------|-------------|--------------|----------------------------|------|---------|------|---------|-------|
|                               |      |             |              |                            |      |         |      |         |       |
| Long-term                     | 22   | 2           | 12           | 4                          | 10   | 5       | 0    | 20      | 75    |
| Middle-term                   | 8    | 0           | 6            | 6                          | 6    | 7       | 2    | 15      | 50    |
| Short-term                    | 9    | 0           | 8            | 2                          | 2    | 2       | 0    | 8       | 31    |
| Not applicable/No information | 16   | 4           | 32           | 10                         | 12   | 7       | 0    | 115     | 196   |

### ***RQ7: Funding Source.***

This category was analyzed to understand how research in this area is funded. We organized the funding sources into three groups: private sources (e.g., companies or private foundations); public sources (regional, national or international programs); and local sources (e.g., the institution/s where the authors of the paper work).

Table 18 shows that most of the funding in the papers selected in this review come from local (48%, N=167) and public sources (39%, N=138). Only 6% (N=22) of the funding comes from private sources.

**Table 18** Type of funding for the papers included in the review

| Research design | All papers included in the review |             | Most cited papers |             |
|-----------------|-----------------------------------|-------------|-------------------|-------------|
|                 | No. of papers                     | %           | No. of papers     | %           |
| Local funding   | 167                               | 48%         | 26                | 48%         |
| Private         | 22                                | 6%          | 1                 | 2%          |
| Public          | 138                               | 39%         | 23                | 43%         |
| Mixed           | 25                                | 7%          | 4                 | 7%          |
| <b>Total</b>    | <b>352</b>                        | <b>100%</b> | <b>54</b>         | <b>100%</b> |

#### 4. Conclusions and limitations of the study

Considering that the OECD found in a recent report (OECDa, 2015) that the embedding, and thus impact, of technology in education remains sub-optimal, our aim was to learn from the experimental studies published in *Computers & Education* over the last five years, and determine how we can conduct research that is more relevant to the education community.

Although mechanisms were used in order to ensure the consistency and the validity of the results that were obtained, there are certain limitations that restrict our findings. Firstly, restricting the analysis to papers published in *Computers & Education* is one of the study's limitations. Including more journals and research sources would have meant having a bigger corpus of papers for analysis and, therefore, a broader perspective on how the pedagogical use of ICT has been addressed in education. Secondly, the selection process also implies certain limitations. On the one hand, when using particular search criteria we may be dismissing some papers that might usefully have informed the literature review, including all 17 of papers that adopted a qualitative approach. In addition, scientific papers always involve some level of bias, since most papers report only positive results (Matosin, Frank, Engel, Lum, & Newell, 2014).

Regardless of the limitations mentioned above, we accomplished our aim by identifying key gaps in the literature. Understanding these gaps may enhance the relevance of research among the education community in the future. The key gaps are as follows:

- 1) **There is a preponderance of quantitative research within Computers & Education.** Only 55 of the 352 papers about ICT in schools published in *Computers & Education* between 2011 and 2015 inclusive adopted a qualitative approach (Section 3, RQ6). We need to redress the balance between quantitative and qualitative research, and to that end we will be publishing another editorial in the near future that provides guidance on reporting high quality qualitative research.
- 2) **More research is needed from different regions for a better understanding of the global use of technology at school level.** Currently, most of the studies are carried out in North America, Western Europe and Asia, disregarding South America, Africa, Oceania and Eastern Europe (Section 3, RQ2). It is important to



notice that context matters. Making direct comparisons across cultures is problematic and thus we need to broaden the cultural contexts within which research on educational technology is conducted

- 3) **More research is needed in the areas of humanities, natural sciences and formal sciences, especially in mathematics.** The results of this review reveal that most of the articles that were analyzed do not report on the specific disciplines defined by PISA; rather they address transversal disciplines (Section 3, RQ3). Interestingly, many researchers focus on the improvement of 21<sup>st</sup> Century skills. We need more research about how to assess the skills that we think are important in education (such as 21<sup>st</sup> century skills), because unless schools are held accountable against those skills they are not likely to teach them. Our research should be enhancing education so that it is fit for our changing world, not reinforcing historical practices in order to address the gaps that, according by the OECD (OECD, 2015b), are not being bridged by current educational systems.
- 4) **There are very few pre-school studies regarding educational technology in order to explore ICT's effects in early childhood** (Section 3, RQ4). Despite this low number of papers, research has shown the importance of pre-school years in the cumulative learning process of a child (Barnett & Yarosz, 2004).
- 5) **Studies that ignore what teachers do (how ICT is embedded in practice) are unlikely to be of much value.** Most studies are student-centered (Section 3, RQ5). However, only few focus on understanding how ICT is being used and embedded within the curriculum and teachers' pedagogy. The results of our study reveal that most of the papers are student-centered, disregarding the teacher's perspective (Section 3, RQ5). However, involving the teacher is key for ensuring the positive effects that come from students using technology (Darling-Hammond et al., 2015).
- 6) **A small proportion of studies involve study participants in their design (and/or the design of solutions)** (Section 3, RQ6). A lack of involvement of key stakeholders in the design of technological solutions may result in a lack of alignment with learners' and practitioners' daily problems or circumstances, limiting the impact of the interventions (Cober et al., 2015).
- 7) **Where researchers are working within an objectivist approach they should increase the sample sizes and the period over which data are collected.** The results of this study show that, although the number of quantitative studies is high, most of them carry out experiments or quasi-experiments involving fewer than 100 participants (Section 3, RQ6). Less than 50% of the papers involve studies based on data collection over more than twelve weeks. For being generalizable the sample has to be representative (López et al., 2015)
- 8) **Local or public institutions provide most of the funding for the research published in the papers selected in this review.** This results suggests that current research is mainly conducted by scholarly, and that the private sector is not publishing in the channels (Section 3, RQ7).

## REFERENCES

- Aesaert, K., Vanderlinde, R., Tondeur, J., & van Braak, J. (2013). The content of educational technology curricula: a cross-curricular state of the art. *Educational Technology Research and Development*, 61(1), 131-151.
- Alamin, A. A., Shaoqing, G., Le, Z. (2015). The development of educational technology policies (1996-2012) lesson from China and the USA. *International Education Studies*, 8(6), 142-150.
- Barnett, W. S., & Yarosz, D. J. (2004). Who goes to preschool and why does it matter?. *Preschool Policy Matters*, 7.
- Cober, R., Tan, E., Slotta, J., So, H. J., & Könings, K. D. (2015). Teachers as participatory designers: Two case studies with technology-enhanced learning environments. *Instructional Science*, 43(2), 203-228.
- Condie, R., & Munro, B. (2007). The impact of ICT in schools: Landscape review.
- Darling-Hammond, L., Barron, B., Pearson, P. D., Schoenfeld, A. H., Stage, E. K., Zimmerman, T. D., ... & Tilson, J. L. (2015). *Powerful learning: What we know about teaching for understanding*. John Wiley & Sons.
- De Jong, J. H. (2012). Framework for PISA 2015: What 15-years-old should be able to do. 4th Annual Conference of Educational Research Center. Broumana, Lebanon.
- Falagas, M. E., Pitsouni, E. I., Malietzis, G. A., & Pappas, G. (2008). Comparison of PubMed, Scopus, web of science, and Google scholar: strengths and weaknesses. *The FASEB journal*, 22(2), 338-342.
- Finegold, D., & Notabartolo, A. S. (2010). 21st century competencies and their impact: An interdisciplinary literature review. Transforming the US Workforce Development System. In Finegold D, Gatta M, Salzman H, Schurman SJ, eds. Champaign, IL: Labor and Employment Relations Association, 19-56.
- Fu, J. S. (2013). ICT in education: A critical literature review and its implications. *International Journal of Education and Development using Information and Communication Technology*, 9(1), 112.
- Gikandi, J. W., Morrow, D., & Davis, N. E. (2011). Online formative assessment in higher education: A review of the literature. *Computers & Education*, 57(4), 2333-2351.
- Goosen, L., & Van Der Merwe, R. (2015) E-Learners, teachers and managers at e-Schools in South Africa. *Proceedings of the International Conference on e-Learning, ICEL*, 127-134.
- Green, B. N., Johnson, C. D., & Adams, A. (2006). Writing narrative literature reviews for

peer-reviewed journals: secrets of the trade. *Journal of Chiropractic Medicine*, 5(3), 101–117.

Kitchenham, B. (2004). *Procedures for performing systematic reviews*. Keele, UK, Keele University, 33 (2004), 1-26.

Lam, PHC. & Woodhead, P. (2012). A critical analysis of the challenges facing e-leaders in the 21st century: A review and comparison of the information and communication technology development of a public school and a public independent school in Hong Kong. *International Journal of Learning*, 18(3), 131-146.

López, X., Valenzuela, J., Nussbaum, M., & Tsai, C. C. (2015). Some recommendations for the reporting of quantitative studies. *Computers & Education*, 91(C), 106-110.

Luckin, R., Bligh, B., Manches, A., Ainsworth, S., Crook, C., & Noss, R. (2012). *Decoding learning: The proof, promise and potential of digital education*. London: Nesta. Extracted on April 2011 from: <http://www.nesta.org.uk/publications/decoding-learning>

Manathunga, K., Hernández-Leo, D. (2015). Has research on collaborative technologies addressed massiveness? A literature review. *Educational Technology & Society*, 18 (4), 357-370.

Matosin, N., Frank, E., Engel, M., Lum, J. S., & Newell, K. A. (2014). Negativity towards negative results: a discussion of the disconnect between scientific worth and scientific culture. *Disease models & mechanisms*, 7(2), 171-173.

Mumtaz, S. (2000). Factors affecting teachers' use of information and communications technology: a review of the literature. *Journal of information technology for teacher education*, 9(3), 319-342.

OECD, *Students, Computers and Learning*, 2015a. Retrieved on December 2015 from: <http://dx.doi.org/10.1787/9789264239555-en>

OECD, *Education at a Glance*, 2015b. Retrieved on December 2015 from: <http://www.oecd.org/edu/education-at-a-glance-19991487.htm>

Pan, L. (2008). *Preparing literature reviews: qualitative and quantitative approaches* (3rd ed.). Glendale, California: Pyrczak Publishing.

Read, J. (2013). *Reliability and validity. Models of Madness: Psychological, Social and Biological Approaches to Psychosis* (2<sup>nd</sup> Ed.) East Sussex, USA: Routledge.

Ringstaff, C., & Kelley, L. (2002). The learning return on our educational technology investment: A review of findings from research.

Southcott, J., & Crawford, R. (2011). The intersections of curriculum development: Music, ICT and Australian music education. *Australasian Journal of Educational Technology*, 27(1), 122-136.

Torraco, R. J. (2005). Writing integrative literature reviews: Guidelines and examples. *Human Resource Development Review*, 4(3), 352-367.

Underwood, J. (2009). The impact of digital technology: a review of the evidence of the impact of digital technologies on formal education. Becta. Retrieved on December 2015 from: [http://dera.ioe.ac.uk/10491/3/A9RF934\\_Redacted.pdf](http://dera.ioe.ac.uk/10491/3/A9RF934_Redacted.pdf)

Webster, J., & Watson, R. T. (2002). Analyzing the past to prepare for the future: Writing a literature review. *Management Information Systems Quarterly*, 26(2), 3.

Wu, W.-H., Jim, Y.-C., Chen, C.-Y., Kao, H.-Y., Lin, C.-H. (2012). Review of trends from mobile learning studies: A meta-analysis. *Computers & Education*, 59:817-827, 2012.

Yang, H. (2012). ICT in English schools: transforming education? *Technology, pedagogy and education*, 21(1), 101-118.

Zurita, G., Merigó, J. M., & Lobos-Ossandón, V. Influential journals in educational research: A bibliometric overview. Extracted on November 2015 from: <http://www.cgin.cl/images/wp/wp-01-2015.pdf>

## ANNEX

**Table A1.** Papers IDs that accumulate the 50% of the citations in both databases Google Scholar and Scopus. The full list of papers considered in the review is available at the following link:  
[https://docs.google.com/spreadsheets/d/1OZ3uCOt9li08\\_zeE\\_aekqj3su\\_8wWbaV\\_049h6Wod1I/edit](https://docs.google.com/spreadsheets/d/1OZ3uCOt9li08_zeE_aekqj3su_8wWbaV_049h6Wod1I/edit)

| #  | Article Title                                                                                                                                                                 | Num. of citations in Google Scholar | Num. of citations in Scopus |
|----|-------------------------------------------------------------------------------------------------------------------------------------------------------------------------------|-------------------------------------|-----------------------------|
| 1  | Modeling primary school pre-service teachers' Technological Pedagogical Content Knowledge (TPACK) for meaningful learning with information and communication technology (ICT) | 139                                 | 63                          |
| 2  | Effects of constructing versus playing an educational game on student motivation and deep learning strategy use                                                               | 132                                 | 62                          |
| 3  | Mobile English learning: An evidence-based study with fifth graders                                                                                                           | 122                                 | 56                          |
| 4  | An interactive concept map approach to supporting mobile learning activities for natural science courses                                                                      | 113                                 | 56                          |
| 5  | A knowledge acquisition approach to developing Mindtools for organizing and sharing differentiating knowledge in a ubiquitous learning environment                            | 76                                  | 48                          |
| 6  | A case study of the in-class use of a video game for teaching high school history                                                                                             | 117                                 | 47                          |
| 7  | Factors influencing teachers' intention to use technology: Model development and test                                                                                         | 113                                 | 46                          |
| 8  | A collaborative game-based learning approach to improving students' learning performance in science courses                                                                   | 82                                  | 46                          |
| 9  | An online game approach for improving students' learning performance in web-based problem-solving activities                                                                  | 86                                  | 44                          |
| 10 | Learning in a u-Museum: Developing a context-aware ubiquitous learning environment                                                                                            | 82                                  | 43                          |
| 11 | "Games are made for fun": Lessons on the effects of concept maps in the classroom use of computer games                                                                       | 77                                  | 43                          |
| 12 | Teachers and game-based learning: Improving understanding of how to increase efficacy of adoption                                                                             | 77                                  | 39                          |

|    |                                                                                                                                         |    |    |
|----|-----------------------------------------------------------------------------------------------------------------------------------------|----|----|
| 13 | Effects of teaching and learning styles on students' reflection levels for ubiquitous learning                                          | 95 | 39 |
| 14 | An alternate reality game for language learning: ARGuing for multilingual motivation                                                    | 68 | 35 |
| 15 | Factors influencing secondary school teachers' adoption of teaching blogs                                                               | 67 | 32 |
| 16 | Enhancing 5th graders' science content knowledge and self-efficacy through game-based learning                                          | 63 | 31 |
| 17 | Interactive augmented reality system for enhancing library instruction in elementary schools                                            | 47 | 30 |
| 18 | Learning and motivational impacts of a multimedia science game                                                                          | 62 | 29 |
| 19 | Are educational computer micro-games engaging and effective for knowledge acquisition at high-schools? A quasi-experimental study       | 59 | 29 |
| 20 | The student experience of a collaborative e-learning university module                                                                  | 62 | 29 |
| 21 | Computer adaptive practice of Maths ability using a new item response model for on the fly ability and difficulty estimation            | 58 | 29 |
| 22 | A framework for the design and integration of collaborative classroom games                                                             | 55 | 28 |
| 23 | Design guidelines for Classroom Multiplayer Presential Games (CMPG)                                                                     | 39 | 28 |
| 24 | Using Wiki in teacher education: Impact on knowledge management processes and student satisfaction                                      | 56 | 28 |
| 25 | Building virtual cities, inspiring intelligent citizens: Digital games for developing students' problem solving and learning motivation | 68 | 27 |
| 26 | Computer games created by middle school girls: Can they be used to measure understanding of computer science concepts?                  | 58 | 27 |
| 27 | Impact of an augmented reality system on students' motivation for a visual art course                                                   | 96 | 27 |

|    |                                                                                                                                                                                             |    |    |
|----|---------------------------------------------------------------------------------------------------------------------------------------------------------------------------------------------|----|----|
| 28 | Exploring the TPACK of Taiwanese elementary mathematics and science teachers with respect to use of interactive whiteboards                                                                 | 59 | 26 |
| 29 | The study on integrating WebQuest with mobile learning for environmental education                                                                                                          | 63 | 26 |
| 30 | Young students using iPads: App design and content influences on their learning pathways                                                                                                    | 56 | 26 |
| 31 | The beliefs behind the teacher that influences their ICT practices                                                                                                                          | 74 | 25 |
| 32 | An analysis of the relationship between information and communication technology (ICT) and scientific literacy in Canada and Australia                                                      | 50 | 25 |
| 33 | Factors related to pedagogical beliefs of teachers and technology integration                                                                                                               | 76 | 25 |
| 34 | From Moodle to Facebook: Exploring students' motivation and experiences in online communities                                                                                               | 56 | 25 |
| 35 | A concept map-embedded educational computer game for improving students' learning performance in natural science courses                                                                    | 54 | 24 |
| 36 | Scaffolding strategies for supporting middle school students' online inquiry processes                                                                                                      | 38 | 23 |
| 37 | A framework for teachers' integration of ICT into their classroom practice                                                                                                                  | 77 | 23 |
| 38 | Students' views of collaboration and online participation in Knowledge Forum                                                                                                                | 59 | 23 |
| 39 | Assessment of 21st century ICT skills in Chile: Test design and results from high school level students                                                                                     | 41 | 22 |
| 40 | Parental acceptance of digital game-based learning                                                                                                                                          | 48 | 22 |
| 41 | E-books effectiveness in promoting phonological awareness and concept about print: A comparison between children at risk for learning disabilities and typically developing kindergarteners | 46 | 22 |
| 42 | EcoMOBILE: Integrating augmented reality and probeware with environmental education field trips                                                                                             | 58 | 22 |



|    |                                                                                                                                                         |    |    |
|----|---------------------------------------------------------------------------------------------------------------------------------------------------------|----|----|
| 43 | Developing Web-based assessment strategies for facilitating junior high school students to perform self-regulated learning in an e-Learning environment | 31 | 21 |
| 44 | Are young generations in secondary school digitally competent? A study on Italian teenagers                                                             | 62 | 21 |
| 45 | Digital storytelling for enhancing student academic achievement, critical thinking.; Learning motivation: A year-long experimental study                | 73 | 21 |
| 46 | A personalized recommendation-based mobile learning approach to improving the reading performance of EFL students                                       | 45 | 21 |
| 47 | Teachers' acceptance and use of an educational portal                                                                                                   | 42 | 21 |
| 48 | From access to usage: The divide of self-reported digital skills among adolescents                                                                      | 53 | 20 |
| 49 | Game-based curriculum and transformational play: Designing to meaningfully positioning person, content, and context                                     | 47 | 19 |
| 50 | Exploring pre-service teachers' beliefs about using Web 2.0 technologies in K12 classroom                                                               | 50 | 19 |
| 51 | Effective learning in science: The use of personal response systems with a wide range of audiences                                                      | 52 | 17 |
| 52 | Evaluation of learners' attitude toward learning in ARIES augmented reality environments                                                                | 42 | 14 |
| 53 | Exploring the potential of the will, skill, tool model in Ghana: Predicting prospective and practicing teachers' use of technology                      | 44 | 14 |
| 54 | Teachers' perceptions of the barriers to technology integration and practices with technology under situated professional development                   | 73 | 10 |
